# Supplementary material for: Drug resistance characteristics and cluster analysis of M. tuberculosis in Chinese patients with multiple episodes of anti-tuberculosis treatment
Source: BMC Infect Dis. 2016 Jan 7;16:4. doi: 10.1186/s12879-015-1331-z (PMC4704432; doi:10.1186/s12879-015-1331-z)
Supplement: Additional file 1: — MIRU-VNTR data of the Beijing family Mtb strain. (XLSX 25 kb) [file 12879_2015_1331_MOESM1_ESM.xlsx]

## Sheet: Sheet1
	24 MIRU-VNTR loci																								Hypervariable loci
code	154	424	577	580	802	960	1644	1955	2059	2163b	2165	2347	2401	2461	2531	2687	2996	3007	3171	3192	3690	4052	4156	4348	Qub-11a	QUB-3232	VNTR 4120	VNTR 3820
1102	2	4	4	2	1	3	2	4	2	6	4	4	4	2	5	1	7	3	3	5	3	2	4	3	8	16	10	10
1103	2/4	4	4	2	3	3	3	4	2	6	4	4	4	2	5	1	7	3	3	2	3	7	4	3	8	16	10	11
1108	2	4	4	2	3	3	3	5	2	6	4	4	4	2	5	1	3/7	3	3	4	3	8	2	3	8	17/19	9	13
1110	2	4	4	2	3	3	3	3	1	4	4	4	4	2	5	1	7	3	3	6	3	7	4	3	8	19	9	14
1113	2	4	4	2	3	3	3	3	1	4	4	4	4	2	5	1	7	3	3	6	3	7	4	3	8	19	9	14
1119	2	4	4	2/3	3	3	3	5	2	5	4	4	4	2	5	1	7	3	3	5/3	3	7	2	3	7	6	11	12
1120	2	2/4	4	2	2/3	3	3	5	2	6	4	4	4	2	5	1	8	3	3	4	3	7	2	3	8	16	8/11	10
1122	2	4	4	2	3	3	3	4	1	4	4	4	4	2	5	1	7	3	3	6	3	7	4	3	4	5	6	9
1201	2	4	4	2	3	3	3	4	1	4	4	4	4	2	5	1	7	3	3	6	3	7	4	3	4	5	6	11
1202	2	4	4	2	3	3	3	5	2	6	4	4	4	2	5	1	5	3	3	5	3	8	2	3	7	6	9	12
1205	2	4	4	2	3	3/2	3	5	2	6	4	4	4	2	5	1	8	2/3	3	4	2	7	4	3	8	13	10	15
1207	2	4	4	2	3/4	3	3	5	2	6	4	4	4	1/2	5	1	8/7	3	3	4/5	3	7	2	3	8	13	10	15
1208	2	2/4	4	2	4	3	3	4	1	4	4	4	4	2	5	1	7	3	3	6	3	7	3	3	8	13	10	15
1209	2	4	4	2	3	3	3	4	2	8	4	4	4	2	5	1	7	3	3	2	3	7	4	3	8	13	10	15
1210	2	4	4	2	3	3	3	4	1	4	4	4	4	2	5	1	7	3	3	6	3	7	4	3	4	5	6	11
1215	2	4	4	2	3	3	3	6	2	7	4	4	4	2	5	1	7	3	3	5	3	8	2	2	8	13	11	15
1216	2	2/4	4	2	3	3/5	3	4	1	5	4	4	4	2	2/5	1	7	3	3	5	3/5	7	4	2/3	8	13	10/11	15
1223	2	1	4	2	3	3	3	6	2	6	4	4	4	2	5	1	7	3	3	5	3	8	2	2	7	20	10	12
1224	2	4	3	2	3	3	3	5	2	6	4	4	4	2	5	1	8	3	3	6	2	8	2	3	7	20	10	12
1227	2	3	4	2	3	3	3	5	1	5	4	4	4	2	5	1	5	3	3	6	2	7	4	3	8	6	6	14
1230	2	4	4	2	3	3	3	4	1	5	4	4	4	3	5	1	7	3	3	5	3	7	4	3	8	16	10	10
1234	2	4	3/4	2	3	3	3	3/5	2	6	4	4	4	2	5	1	8	3	3	4	3	7	2	3	8	19	9	14
1238	2	4	4	2	3	3	3	6	2	6	4	4	4	2	5	1	7	3	3	5	3	8	2	2	8	19	9	14
1240	2	4	4	2/3	3	2/3	3	4	1	4	4	4	4	1/2	5	1	7	3	3	6	3	6/9	4	3	8	19	9	14
2105	2	4	4	2	3	3	3/2	3	1	4	4	4	4	2	5	1	7	3	3	6	3	7	4	3	8	11	9	11
2110	2	4	4	2	3	3	3	3	1	4	4	4	4	2	5	1	7	3	3	6	3	7	4	3	8	9	9	11
2114	2	4	4	2	3	3	3	5	2	5	4	4	4	2	5	1	6/7	3	3	4/5	3	8	2/4	3	7	12	10	14
2115	2	4	4	2	3	3	3	4	1	5	4	4	4	2	6	1	7	2	3	5	2	8	3	3	7	13	11	16
2120	2	4	4	2	3	3	3	6	2	6	4	4	4	2	5	1	7	3	3	5	3	8	2	2	8	19	9	14
2121	2	4	4/5	2	3	3	3	4	1	4	4	4	4	2	5	1	7	3	3	6	3	7	4	3	1	14	9	17
2126	2	5	4	2	3	3	2	5	2	4	4	4	4	2	5	1	7	3	3	5	3	8	2	3	1	14	9	17
2127	2	3	4	2	3	3	2	4	2	4	4	4	4	2	6	1	7	3	3	5	3	7	3	3	1	14	9	17
2129	2	4	4	2	3	3/2	3	4	1	4/5	4	4	4	2	5	1	7	3	3	6	3/5	7	4	3	7/8	13	8	14
2130	2	4	4	2	3	3	3	5	2	5	4	4	4	2	6	1	5	3	3	5	3	8	2	4	7	14	9	14
2131	2	4	4	2/3	3	3	3	5	2	6	4	4	4	2	5	1	5/7	3	3	5	3	8	2	3	8	13	8	14
2202	2	4	4	2	3	3	3	5	2	6	4	4	4	2	5	1	8	3	3	4	3	7	2	3	8	13	8	14
2203	2	4	4	2	2	3	3	4	2	6	4	4	4	2	5	1	7	3	3	5	3	7	2	3	7	12	6	14
2205	2	3/4	4	2	3	3	3	5	2	6	4	4	4	2	2/5	1	7	3	3	5	3	8	2	3	7	12	6	14
2209	2	1	4	2	3	3	3	6	2	6	4	4	4	2	5	1	7	3	3	5	3	8	2	2	7	20	10	12
2211	2	5	4	2	4	3	3	4	1	4	4	4	4	2	5	1	7	3	3	6	3	4	2	3	7	12	6	14
2212	2	4	4	2	3	3	3	3	1	4	4	4	4	2	5	1	7	3	3	6	3	7	4	3	5	13	12	14
2215	2	4	4	2	3/4	3	3	5	2	6	4	4	4	2	5	1	8	3	3	4	3	7/9	2	3	5	13	12	14
2221	2	4	4	2	3	3	3	6	2	6	4	4	4	2	5	1	7	3	3	5	3	8	2	2	8	19	9	14
2222	2	4	4	2	3	3	2	4	1	5	4	4	4	2	5	1	7	3	3	5	3	7	4	3	8	10	6	14
2224	2	3	4	2	3	3	3	4	2	6	4	4	4	2	5	1	8	3	3	5	3	9	4	4	8	10	6	14
2225	2	4	4	2	3	3	3	4	2	7	4	4	4	2	5	1	7	3	3	2	3	6	4	3	9	9	9	12
2226	2	4	4	2	3	3	3	4	2	6	4	4	4	2	5	1	7	3	3	4	3	7	4	3	9	9/11	9	12
2227	2	1	4	2	3	3	3	6	2	6	4	4	4	2	5	1	7	3	3	5	3	8	2	2	7	20	10	12
2228	2	4	4	2	3	3	3	4	2	7	2	4	4	2	5	1	7	3	3	2	3	7	4	3	1	13	11	14
2229	2	4	4	2	3	3	3	4	2	6	3/4	4	4	2	5	1	7	3	3	2	3/5	7	2	3	1	13	11	14
2230	2	3	4	2	3	3	3	4	2	6	4	4	4	2	5	1	8	3	3	5	3	9	4	4	8	10	6	14
3109	2	4	4	2	3	3	3	5	2	4	4	4	4	2	5	1	7	3	3	4	3	8	2	3	5	9	8	9
3122	2	4	4	2	3	3	3	4	2	6	4	4	4/2	2	5	1	7	3	3	2	3	7	2	3	7	15	8	16
3134	2	4	4	2	3	3	3	4	2	6	4	4	4	2	6	1	6	3	2	4	3	6	4	3	7	10	8	16
3140	2	4	3	2	3	3	3	5	2	6	4	4	4	2	5	1	7	3	3	5	2	8	2	3	7	9	6	16
3148	2	1	4	2	2	3	3	4	2	5	4	4	4	2	6	1	5	3	3	4	4	8	2	3	7	9	6	16
3153	2	4	4	2	3	3	2	5	2	6	4	4	4	2	6	1	6	4	3	4	3	7	2	3	8	15	10	14
3201	2	4	4	2	3	3	2	4	1	5	4	4	4	2	5	1	6	4	3	4	3	7	4	3	8	15	10	14
3207	2	4	4	2	3	2	3	4	2	9	4	4	4	2	5	1	4	3	3	5	5	8	3	3	8	15	10	14
3210	2	4	4	2	3	3	3	5	2	9	4	4	4	2	5	1	7	3	3	5	3	8	2	3	8	16	8	12
3214	2	4	2	2	3	5	4	4	2	1	4	4	4	2	5	1	7	3	3	4	4	7	4	2	8	16	8	12
3220	2	4	4	2	3	3	3	4	1	4	4	4	4	2	5	1	7	3	3	6	3	7/8	2	3	7	13	11	9
3221	2	4	4	2	3	3	3	5	2	9	4	4	4	2	5	1	7	3	3	5	3	8	2	3	8	16	8	12
3223	2	4	4	2	3	3	3	4	1	2/5	4	4	4	2	5	1	7	3	3	4	3	7	4	3	7/8	12	10	14
3232	2	4	4	2	2	3	3	5	2	6	4	4	4	2	5	1	5	3	3	5	3	8	2	3	8	12	10	14
3243	2	2	4	2	3	2	3	3	2	1	3	4	2	1	5	1	5	3	3	3	4	6	2	2	8	12	10	14
3246	2	4	4	2	3	3	3	5	1/2	6	3/5	4	4	2	5	1	8	3	3	4	3	7	2/3	3	7	15	11	12
3249	2	4	4	2	3	3	3	4	2	6	4	4	4	2	5	1	5	3	3	2	3	7	4	3	7	15	11	12
3251	2	4	4	2	3	3	3	4	2	6	4	4	4	2	5	1	5	3	3	2	3	7	4	3	7	15	11	12
3254	2	4	4	2	3	3	3	5	2	6	4	4	2	2	5	1	7	3	3	6	3	8	2	3	1	10	8	17
3302	2	4	4	2	1/2	3	3	5	2	6	4	4	4	2	5	1	7	3	3	5	3	5/8	2	3	1	10	8	17
3305	2	4	4	2	3	3	3	4	2	6	4	4	4	2	5	1	5	3	3	2	3	7	4	3	7	15	11	12
3313	2	3/5	4	2	3	3	3	5	2	4	4	4	4	2	2/5	1	7	3	3	4/5	3	8	2	2/3	8	15	10	15
3318	2	4	4	2	3	3	3	4	1	6	4	4	4	2	5	1	7	3	3	3	3	7	4	3	8	15	10	15
3325	2	4	4	2	4	3	3	5	2	5	4	4	4	2	5	1	7	3	3	5	3	8	2	3	8	15	10	15
3326	2	4	2	2	3	5	4	4	2	2	4	4	4	2	5	1	7	3	3	4	4	7	4	3	8	15	10	15
3327	2	4	4	2/3	3	3	3	4	2	6	4	4	4	2	5	1	5	3	3	5	3	7	4	3	8	15	10	15
3329	2	4	4	2	3	3	3	4	2	6	4	4	4	2	5	1	7	3	3	2	3	7	4	3	7	15	11	12
3331	2	4	4	2	3	3	3	4	2	6	4	4	4	2	5	1	7	3	3	2	3	7	4	3	7	15	11	12
3336	2	3	4	2	3	3	3	4	2	6	4	4	4	2	5	1	8	3	3	5	3	8	4	3	5	13	12	14
3337	2	2	4	2	3	2	3	3	2	4	4	4	2	1	5	1	5	4	3	3	4	8	2	3	5	13	12	14
3339	2	4	4	2	1/2	3	3	4	2	6/7	4	4	4	2	5	1	7	3	3	5	3	7	4	2	8	16	10	10/12
3341	2	4	4	2	3	3	3	4	2	7	4	4	4	2	5	1	7	3	3	2	3	7	4	3	8	16	10	10
3345	2	4	4	2	4	3	3	4	1	5	4	4	4	2	5	1	7	3	3	6	3	7	1	3	8	19	9	14
3350	2	4	4	2	3	3	3	4	2	6	3	4	4	2	5	1	8	3	3	5	3	7	4	3	8	19	9	14
3352	2	4	4	2	3	3	3	5	1	4	3	4	4	2	5	1	7	3	3	6	3	7	4	3	5	13	12	14
3358	2	3	4	1	3	3	2	5	2	3	4	4	4	2	5	1	7	3	3	5	3	8	2	2	8	9	9	11
3360	2	4	4	2	4	3	3	4	1	5	4	4	4	2	5	1	7	3	3	6	3	7	1	3	8	19	9	14
3361	2	4	4	2	3	3	2	4	1	5	2	4	4	1/2	5	1	7	3	3	5	3	7	2	3	4	5	6	13
4001	2	4	4	2	3	3	2	4	1	5	2	4	4	2	5	1	7	3	3	5	3	7	4	3	4	5	6	13
4002	2	4	4	4	3	3	3	4	2	6	4	4	4	2	5	1	6	3	3	5	3	8	2	3	4	5	6	13
4003	2	4	4	2	1	3	3	4	2	7	4	4	4	2	5	1	7	3	3	2	3	7	4	3	8	13	10	15
4004	2	1	4	2	2	3	3	4	2	5	4	4	4	2	6	1	5	3	3	4	4	8	2	3	7	9	6	16
4005	2	4	4	2	3	3	3	5	2	5	4	4	4	2	5	1	7	3	3	4	1/3	8	2	3	8	13	10	15
4006	2	3	4	2	3	3	3	4	1	4	4	4	4	2	5	1	7	3	3	6	3	7	4	3	8	13	10	15
4007	2	4	4	2	3	3	3	4	2	6	4	4	4	3	5	1	7	3	3	5	3	9	3	3	8	12	10	14
4008	2	4	4	2	4	3	3	4	1	4	4	4	4	2	5	1	7	3	3	6	3	7	4	3	8	13	11	15
4009	2	4	4	2	3	3	3	5	2	4	4	4	4	2	5	1	7	3	3	5	3	7	2	3	8	13	11	15
4010	2	4	4	2	3	3	3	3	1	5	4	4	4	3	5	1	7	3	3	5	3	8	4	3	7	20	10	12
4011	2	4	4	2	3	3	3	4	2	6	4	4	3	2	6	1	7	3	3	4	3	7	4	3	7	20	10	12
4012	2	4	4	2	3	3	3	4	2	6	4	4	4	2	5	1	7	3	3	5	3	7	4	3	8	6	6	14
4013	2	5	4	2	3	3	3/5	5	2	4	4	4	4	2/3	5	1	7	3	3	4/5	3	8	2	3	8	16	10	10
4014	2	1	4	2	2	3	3	4	2	5	4	4	4	2	6	1	5	3	3	4	4	8	2	3	7	9	6	16
4015	2	4	4	3	2	2	3	1	2	2	4	4	2	2	5	1	5	2	3	3	1	7	2	1	8	19	9	14
4016	2	4	4	2	3	3	3	4	2	8	4	4	4	2	5	1	7	3	3	5	3	7	4	3	8	19	9	14
4017	2	4	4	2	3	3	3	4	1	6	4	4	4	3	5	1	7	3	3	5	3	7	4	3	8	9	9	11
4018	2	4	4	2	3	3	3	4	1	5	4	4	4	2	5	1	8	3	3	5	3	2	4	3	8	9	9	11
4019	2	4	4	2	3	2/1	3	4	1	6/7	4	4	4	2	2/5	1	7	3	3	5	2	7	4	3	7	12	10	14/15
4020	2	4	4	2	3	3	3	5	2	6	4	4	2	2	5	1	8	3	3	5	3	8	4	3	7	9	9	14
4021	2	5	4	2	3	3	3	4	2	6	4	4	4	2	5	1	7	3	3	5	3	7	4	3	7	12	10	14
4022	2	4	4	2	3	3	3	4	2	8	4	4	4	2	5	1	7	3	3	5	3	7	4	3	8	19	9	14
4023	2	4	4	2	3	3	3	4	2	6	4	4	4	2	5	1	7	3	3	2	3	12	4	2	1	12	10	17
4024	2	2	5	2	3	2	2	2	2	3	3	4	2	1	5	1	7	3	3	3	3	12	2	2	1	14	9	17
4025	2	4	4	2	3	3	3	4	2	3	4	4	2	2	5	1	4	3	4	3	2	12	2	3	8	12	10	14
4026	2	4	4	2	4	3	3	5	2	6	4	4	4	2	5	1	4	3	3	5	3	8	2	3	8	13	8	14
4027	2	3	4	1	3	3	2	5	2	3	4	4	4	2	5	1	7	3	3	5	3	8	2	3	8	13	8	14
4028	2	4	4	2	3	3	4	4	2	6	4	4	4	2	5	1	7	3	3	5	3	7	4	3	8	13	8	14
4029	2	4	3	2	3	3	3	5	2	6	4	4	4	2	5	1	8	3	3	6	2	8	2	3	7	12	6	14
4030	2	3	4	2	3	3	4	4	2	6	4	4	4	2	5	1	6	3	3	4	3	7	3	2	7	12	6	14
4031	2	4	4	2	3	3	3	4	2	6	4	4	4	2	5	1	7	2	3	5	4	7	4	3	7	12	6	14
4032	2	4	4	2	3	3	3	4	2	6	4	4	4	2	5	1	7	2	3	5	4	7	4	3	7	12	6	14
4033	2	4	4	2	3	3	4	4	2	6	4	4	4	2	5	1	7	3	3	2	5	7	4	3	5	13	12	14
4034	2	4	4	2	3	3	3	4	1	4	4	4	4	2	5	1	7	3	3	6	3	8	4	3	5	13	12	14
4035	2	3	4	2	3	3	3	4	2	4	4	4	4	2	5	1	6	3	3	4	3	6	3	3	5	13	12	14
4036	2	4	4	2/5	3	3	3/5	4	1	4	4	4	4/2	2	5	1	7	3	3	5	2	7	4	3	8	10	6	14
4038	2	4	4	2	3	3	3	5	2	5	4	4	4	2	5	1	7	3	3	5	3	8	2	3	8	10	6	14
4039	2	4	4	2	3	3	3	5	2	5	4	4	4	2	5	1	7	3	3	5	3	8	2	3	9	9	9	12
4040	2	4	4	2	3	3	3	5	2	5	4	4	4	2	5	1	7	3	3	5	3	8	2	3	9	9	9	12
4041	2	4	4	2	3	3	3	5	2	6	4	4	4	2	5	1	5	3	3	5	3	8	2	3	1	13	11	14
4042	2	4	4	2	3	3	3	4	2	6	4	4	2	2	5	1	7	3	3	5	4	8	4	3	1	10	10	14
4043	2	3	4	2	3	3	3	4	1	5	4	2	4	2	5	1	7	3	3	5	3	7	4	3	1	13	11	14
4044	2	2	4	2	3	2	3	3	2	8	3	4	2	1	5	1	5	3	3	4	3	8	2	2	5	9	8	9
4045	2	2	4	2	3	2	3	3	2	8	3	4	2	1	5	1	5	3	3	4	3	8	2	2	5	9	8	9
4046	2	3	4	2	3	3	3	5	2	6	4	4	4	2	5	1	7	3	3	4	3	8	2	3	7	15	8	16
4047	2	4	4	2	3	3	3	5	2	5	4	4	4	2	5	1	7	3	3	5	3	8	2	3	9	9	9	12
4049	2	4	4	3	3	2	3	3	4	2	4	4	4	2	5	2	5	3	3	4	3	8	3	2	8	12	11	14
4051	2	4	4	3	5	2	2	4	4	5	4	4	4	2	5	2	7	2	3	5	4	9	3	3	7	13	9	11
4052	2	5	4	2	2	5	1	4	4	1	4	4	2	2	5	2	1	3	3	3	2	8	4	3	8	19	10	17
